# Supplementary material for: Potential of Pantoea dispersa as an effective biocontrol agent for black rot in sweet potato
Source: PubMed Central journal article supplement (PMC6841936; doi:10.1038/s41598-019-52804-3), 2019-11-08
Supplement: 41598_2019_52804_MOESM1_ESM.pdf [file 41598_2019_52804_MOESM1_ESM.pdf]

## Supplementary Information

# **Potential of *Pantoea dispersa* as an effective biocontrol agent for black rot in sweet potato**

Lingmin Jiang<sup>1,4</sup> • Jae Chul Jeong<sup>1</sup> • Jung-Sook Lee<sup>1</sup> • Jeong Mee Park<sup>2</sup> • Jung-Wook Yang<sup>3</sup> • Myoung Hui Lee<sup>1</sup> • Seung Hee Choi<sup>1</sup> • Cha Young Kim<sup>1</sup> • Dae-Hyuk Kim<sup>4</sup> • Suk Weon Kim<sup>1,\*</sup> • Jiyoung Lee<sup>1,\*</sup>

<sup>1</sup>Korean Collection for Type Cultures (KCTC), Biological Resource Center, Korea Research Institute of Bioscience & Biotechnology (KRIBB), Jeongeup, 56212, Republic of Korea

<sup>2</sup>Plant Systems Engineering Research Center, KRIBB, Daejeon, 34141, Republic of Korea

<sup>3</sup>Crop Cultivation & Environment Research Division, NICS, Suwon, 16429, Republic of Korea

<sup>4</sup>Department of Bioactive Materials, Chonbuk National University, Jeonju, 54896 Republic of Korea

\*Corresponding authors: Suk Weon Kim and Jiyoung Lee

Email: (SWK) [kimsw@kribb.re.kr](mailto:kimsw@kribb.re.kr); (JL) [jiyoung1@kribb.re.kr](mailto:jiyoung1@kribb.re.kr)

**Supplementary Table S1.** The primers that were used in this study

| Primer name | Target      | Sequence (5'→3')               | No. bases |
|-------------|-------------|--------------------------------|-----------|
| 518 F       | 16S rRNA    | CCA GCA GCC GCG GTA ATA C      | 19        |
| 805 R       | 16S rRNA    | GAC TAC CAG GGT ATC TAA TC     | 20        |
| 21 F        | 16S rRNA    | TTC CGG TTG ATC CYG CCG GA     | 20        |
| 1492 R      | 16S rRNA    | TAC GGY TAC CTT GTT ACG ACT T  | 22        |
| ITS1        | 5.8S rRNA   | TCC GTA GGT GAA CCT GCG G      | 19        |
| ITS4        | 5.8S rRNA   | TCC TCC GCT TAT TGA TAT GC     | 20        |
| gyrB3       | <i>gyrB</i> | GCG TAA GCG CCC GGG TAT GTA    | 21        |
| gyrB4       | <i>gyrB</i> | CCG TCG ACG TCC GCA TCG GTC AT | 23        |
| gyrB3iseq   | <i>gyrB</i> | AAC GCW ATC GAC GAA GC         | 17        |
| gyrB4iseq   | <i>gyrB</i> | TGG AAV CCR TCR TTC CAC        | 18        |
| Vic3        | <i>rpoB</i> | GGC GAA ATG GCW GAG AAC CA     | 20        |
| Vic2        | <i>rpoB</i> | GAG TCT TCG AAG TTG TAA CC     | 20        |

**Supplementary Table S2.** Molecular identification of the microorganisms that were isolated from sweet potato tuberous roots

| Isolate | Accession no. | Tissue         | 16S/5.8S rRNA (bp) | Closest species in Genbank               | Identity |
|---------|---------------|----------------|--------------------|------------------------------------------|----------|
| RO-1    | MN428676      | Tuberous roots | 1341               | <i>Pantoea</i> sp. XFZ20                 | 99%      |
| RO-3    | MN524106      | Tuberous roots | 1448               | <i>Enterobacter kobei</i> DSM 13645      | 99%      |
| RO-4    | MN521826      | Tuberous roots | 409                | <i>Papillotrema laurentii</i>            | 100%     |
| RO-5    | MN524107      | Tuberous roots | 1458               | <i>Bacillus toyonensis</i> PK5-10        | 99%      |
| RO-6    | MN525288      | Tuberous roots | 592                | <i>Neurospora crassa</i>                 | 99%      |
| RO-7    | MN519610      | Tuberous roots | 1431               | <i>Leclercia adecarboxylata</i>          | 99%      |
| RO-8    | MN525289      | Tuberous roots | 537                | <i>Sakaguchia dacryoidea</i> AFTOL-ID    | 98%      |
| RO-11   | MN521827      | Tuberous roots | 672                | <i>Gongronella butleri</i> JGS01         | 99%      |
| RO-12   | MN521828      | Tuberous roots | 579                | <i>Rhodospiridium toruloides</i>         | 99%      |
| RO-13   | MN524109      | Tuberous roots | 1405               | <i>Bacillus safensis</i> SL-40           | 100%     |
| RO-14   | MN524110      | Tuberous roots | 1403               | <i>Bacillus aerius</i> JS-786            | 100%     |
| RO-15   | MN524111      | Tuberous roots | 1417               | <i>Bacillus</i> sp. FJAT-25810           | 100%     |
| RO-16   | MN524112      | Tuberous roots | 1415               | <i>Bacillus</i> sp. NT5                  | 100%     |
| RO-17   | MN524113      | Tuberous roots | 1413               | <i>Bacillus megaterium</i>               | 100%     |
| RO-18   | MN428677      | Tuberous roots | 1467               | <i>Pantoea dispersa</i> GTC 1472         | 99%      |
| RO-19   | MN524114      | Tuberous roots | 1415               | <i>Bacillus aerius</i> 24K               | 99%      |
| RO-20   | MN428678      | Tuberous roots | 1403               | <i>Pantoea dispersa</i> S10              | 100%     |
| RO-21   | MN428679      | Tuberous roots | 1415               | <i>Pantoea dispersa</i> strain DSM 30073 | 99%      |
| RO-22   | MN428683      | Tuberous roots | 1253               | <i>Pantoea</i> sp. XBGRY4                | 98%      |
| RO-23   | MN524115      | Tuberous roots | 1411               | <i>Bacillus subtilis</i> F6-2-31         | 100%     |
| RO-24   | MN524116      | Tuberous roots | 1402               | <i>Bacillus thuringiensis</i> FJAT-28888 | 100%     |
| RO-25   | MN524108      | Tuberous roots | 1389               | <i>Enterobacter aerogenes</i> QTYC24b    | 100%     |
| RO-26   | MN524128      | Tuberous roots | 1408               | <i>Serratia marcescens</i> FZSF01        | 100%     |
| RO-27   | MN524117      | Tuberous roots | 1444               | <i>Bacillus subtilis</i> CICC 10366      | 99%      |

**Supplementary Table S3.** Molecular identification of the microorganisms that were isolated from sweet potato shoots

| Isolate | Accession no. | Tissue | 16S/5.8S<br>rRNA (bp) | Closest species in Genbank                        | Identity |
|---------|---------------|--------|-----------------------|---------------------------------------------------|----------|
| SH-1    | MN428659      | Shoot  | 1391                  | <i>Pantoea ananatis</i> PP1                       | 99%      |
| SH-3    | MN428680      | Shoot  | 1411                  | <i>Pantoea ananatis</i> LMG 20103                 | 99%      |
| SH-4    | MN521829      | Shoot  | 609                   | <i>Rhodotorula</i> sp. CBS 10104                  | 99%      |
| SH-5    | MN428674      | Shoot  | 1401                  | <i>Pantoea ananatis</i> YJ76                      | 99%      |
| SH-6    | MN521814      | Shoot  | 508                   | <i>Mucor circinelloides</i> f. <i>lusitanicus</i> | 100%     |
| SH-8    | MN521815      | Shoot  | 600                   | <i>Mucor irregularis</i> CMFCCC B 50r             | 99%      |
| SH-9    | MN428673      | Shoot  | 1394                  | <i>Pantoea</i> sp. BT-1                           | 99%      |
| SH-10   | MN428682      | Shoot  | 1408                  | <i>Pantoea agglomerans</i> DSM 3493               | 98%      |
| SH-11   | MN524118      | Shoot  | 1403                  | <i>Curtobacterium citreum</i> H00109              | 99%      |
| SH-12   | MN521817      | Shoot  | 526                   | <i>Fusarium fujikuroi</i> MF22418                 | 99%      |
| SH-13   | MN428684      | Shoot  | 1401                  | <i>Pantoea ananatis</i> AJ13355                   | 99%      |
| SH-14   | MN519611      | Shoot  | 1386                  | <i>Microbacterium</i> sp. HBUM178903              | 100%     |
| SH-16   | MN521812      | Shoot  | 633                   | <i>Rhizomucor variabilis</i> CBS 103.93           | 98%      |

**Supplementary Table S4.** Molecular identification of the microorganisms that were isolated from the soil

| Isolate | Accession no. | Tissue | 16S/5.8S rRNA (bp) | Closest species in Genbank                        | Identity |
|---------|---------------|--------|--------------------|---------------------------------------------------|----------|
| SO-1    | MN525287      | Soil   | 616                | <i>Papiliotrema laurentii</i> JCM 28239           | 99%      |
| SO-2    | MN521811      | Soil   | 519                | <i>Cryptococcus laurentii</i> RY1                 | 100%     |
| SO-3    | MN524129      | Soil   | 1468               | <i>Serratia marcescens</i> strain UMH12           | 99%      |
| SO-4    | MN521813      | Soil   | 617                | <i>Mortierella</i> sp. TR065                      | 99%      |
| SO-5    | MN521816      | Soil   | 615                | <i>Mucor circinelloides</i> f. <i>lusitanicus</i> | 100%     |
| SO-6    | MN519612      | Soil   | 1456               | <i>Burkholderia lata</i> FL-1-2-30-S1-D0          | 100%     |
| SO-7    | MN519613      | Soil   | 948                | <i>Pseudomonas fluorescens</i> CLW17              | 99%      |
| SO-8    | MN524119      | Soil   | 1402               | <i>Bacillus safensis</i> ADU20                    | 100%     |
| SO-9    | MN519614      | Soil   | 1413               | <i>Bacterium</i> CDSHDTYG-6                       | 100%     |
| SO-10   | MN524120      | Soil   | 1409               | <i>Bacillus aerius</i> JS-786                     | 100%     |
| SO-11   | MN524121      | Soil   | 1401               | <i>Bacillus</i> sp. Suaeda B-003                  | 100%     |
| SO-12   | MN519615      | Soil   | 1399               | <i>Psychrobacillus psychrodurans</i> NB-9         | 100%     |
| SO-13   | MN428681      | Soil   | 1215               | <i>Pantoea dispersa</i> Y08                       | 100%     |
| SO-14   | MN519616      | Soil   | 1385               | <i>Arthrobacter</i> sp. THG-HS1V                  | 99%      |
| SO-15   | MN524122      | Soil   | 1469               | <i>Bacillus</i> sp. Ag1.10                        | 99%      |
| SO-16   | MN524123      | Soil   | 1410               | <i>Bacillus</i> sp. Suaeda B-003                  | 100%     |
| SO-17   | MN519617      | Soil   | 1104               | <i>Lysinibacillus</i> sp. KR25                    | 97%      |
| SO-18   | MN524124      | Soil   | 1402               | <i>Bacillus</i> sp. NT4                           | 100%     |
| SO-19   | MN524125      | Soil   | 1409               | <i>Lysinibacillus xylanilyticus</i> FJAT-29968    | 99%      |
| SO-20   | MN519618      | Soil   | 1369               | <i>Arthrobacter</i> sp. THG-HS1V                  | 99%      |
| SO-21   | MN519619      | Soil   | 1437               | <i>Pseudomonas fluorescens</i> FW300              | 100%     |
| SO-22   | MN519620      | Soil   | 1391               | <i>Pseudomonas fluorescens</i>                    | 99%      |
| SO-23   | MN521820      | Soil   | 541                | <i>Torula herbarum</i> isolate G10                | 100%     |
| SO-25   | MN521821      | Soil   | 532                | <i>Phoma herbarum</i> G10                         | 99%      |
| SO-26   | MN521822      | Soil   | 587                | <i>Penicillium</i> sp. 196F                       | 99%      |
| SO-27   | MN519621      | Soil   | 1431               | <i>Cupriavidus</i> sp. TBSe5                      | 99%      |
| SO-28   | MN521823      | Soil   | 569                | <i>Penicillium</i> sp. BE                         | 100%     |
| SO-29   | MN519622      | Soil   | 1429               | <i>Microbacteriaceae bacterium</i> YR2-6          | 99%      |
| SO-30   | MN519711      | Soil   | 537                | <i>Ascomycota</i> sp. isolate SK2YWS-L            | 100%     |
| SO-31   | MN521824      | Soil   | 587                | <i>Penicillium</i> sp. 196F                       | 99%      |
| SO-34   | MN524126      | Soil   | 1436               | <i>Bacillus thuringiensis</i> L14                 | 99%      |
| SO-35   | MN521825      | Soil   | 582                | <i>Penicillium</i> sp. YZ02                       | 99%      |
| SO-36   | MN521810      | Soil   | 571                | <i>Aspergillus carneus</i> W2-4                   | 100%     |
| SO-37   | MN519623      | Soil   | 1451               | <i>Streptomyces</i> sp. Je36-6                    | 99%      |
| SO-38   | MN524127      | Soil   | 1442               | <i>Bacillus subtilis</i> ZD-16                    | 100%     |
| SO-39   | MN521809      | Soil   | 533                | <i>Cladosporium subuliforme</i> INIFAT            | 100%     |
| SO-40   | MN521818      | Soil   | 533                | <i>Aspergillus chevalieri</i> SRW9 18S            | 100%     |
| SO-41   | MN521819      | Soil   | 569                | <i>Aspergillus versicolor</i> WZ-2008-0062        | 100%     |

Fig. S1

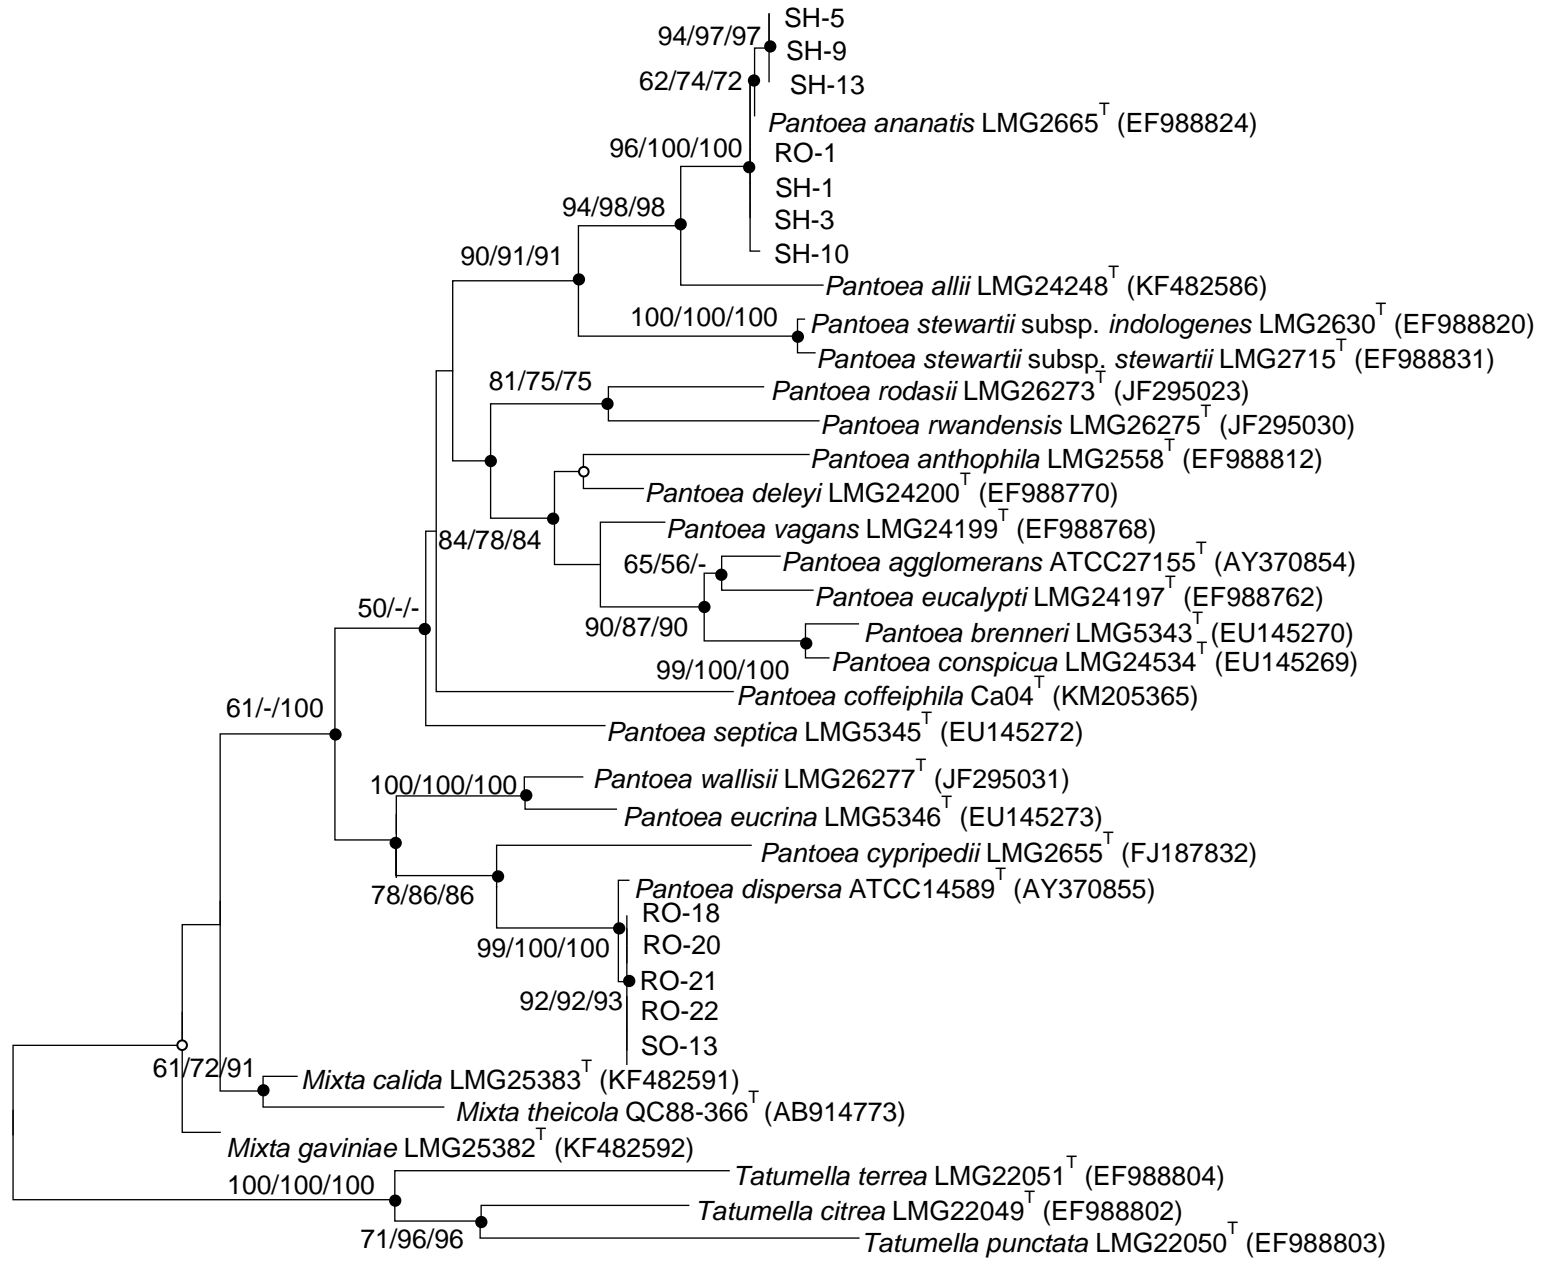

0.050

**Supplementary Fig. S1.** Phylogenetic analysis using the maximum-likelihood (ML) algorithm based on the *gyrB* gene of *Pantoea* isolates and all the *Pantoea* type strains. Bootstrap values (>50%) were calculated using the Neighbor-joining (NJ), and minimum-evolution (ME) algorithm probabilities. Filled circles on the nodes indicate that the relationships were also recovered by NJ and ME algorithms, whereas open circles indicate nodes recovered by either the NJ or the ME algorithm. Bootstrap values are shown on the nodes in percentages of 1000 replications only for values over 50%. The scale bar equals 0.050 changes per nucleotide position.

**Supplementary Fig. S2.** Phylogenetic analysis using the maximum-likelihood (ML) algorithm based on the *rpoB* gene of *Pantoea* isolates and all the *Pantoea* type strains. Bootstrap values (>50%) were calculated using the Neighbor-joining (NJ), and minimum-evolution (ME) algorithm probabilities. Filled circles on the nodes indicate that the relationships were also recovered by NJ and ME algorithms, whereas open circles indicate nodes recovered by either the NJ or the ME algorithm. Bootstrap values are shown on the nodes in percentages of 1000 replications only for values over 50%. The scale bar equals 0.020 changes per nucleotide position.

Fig. S2

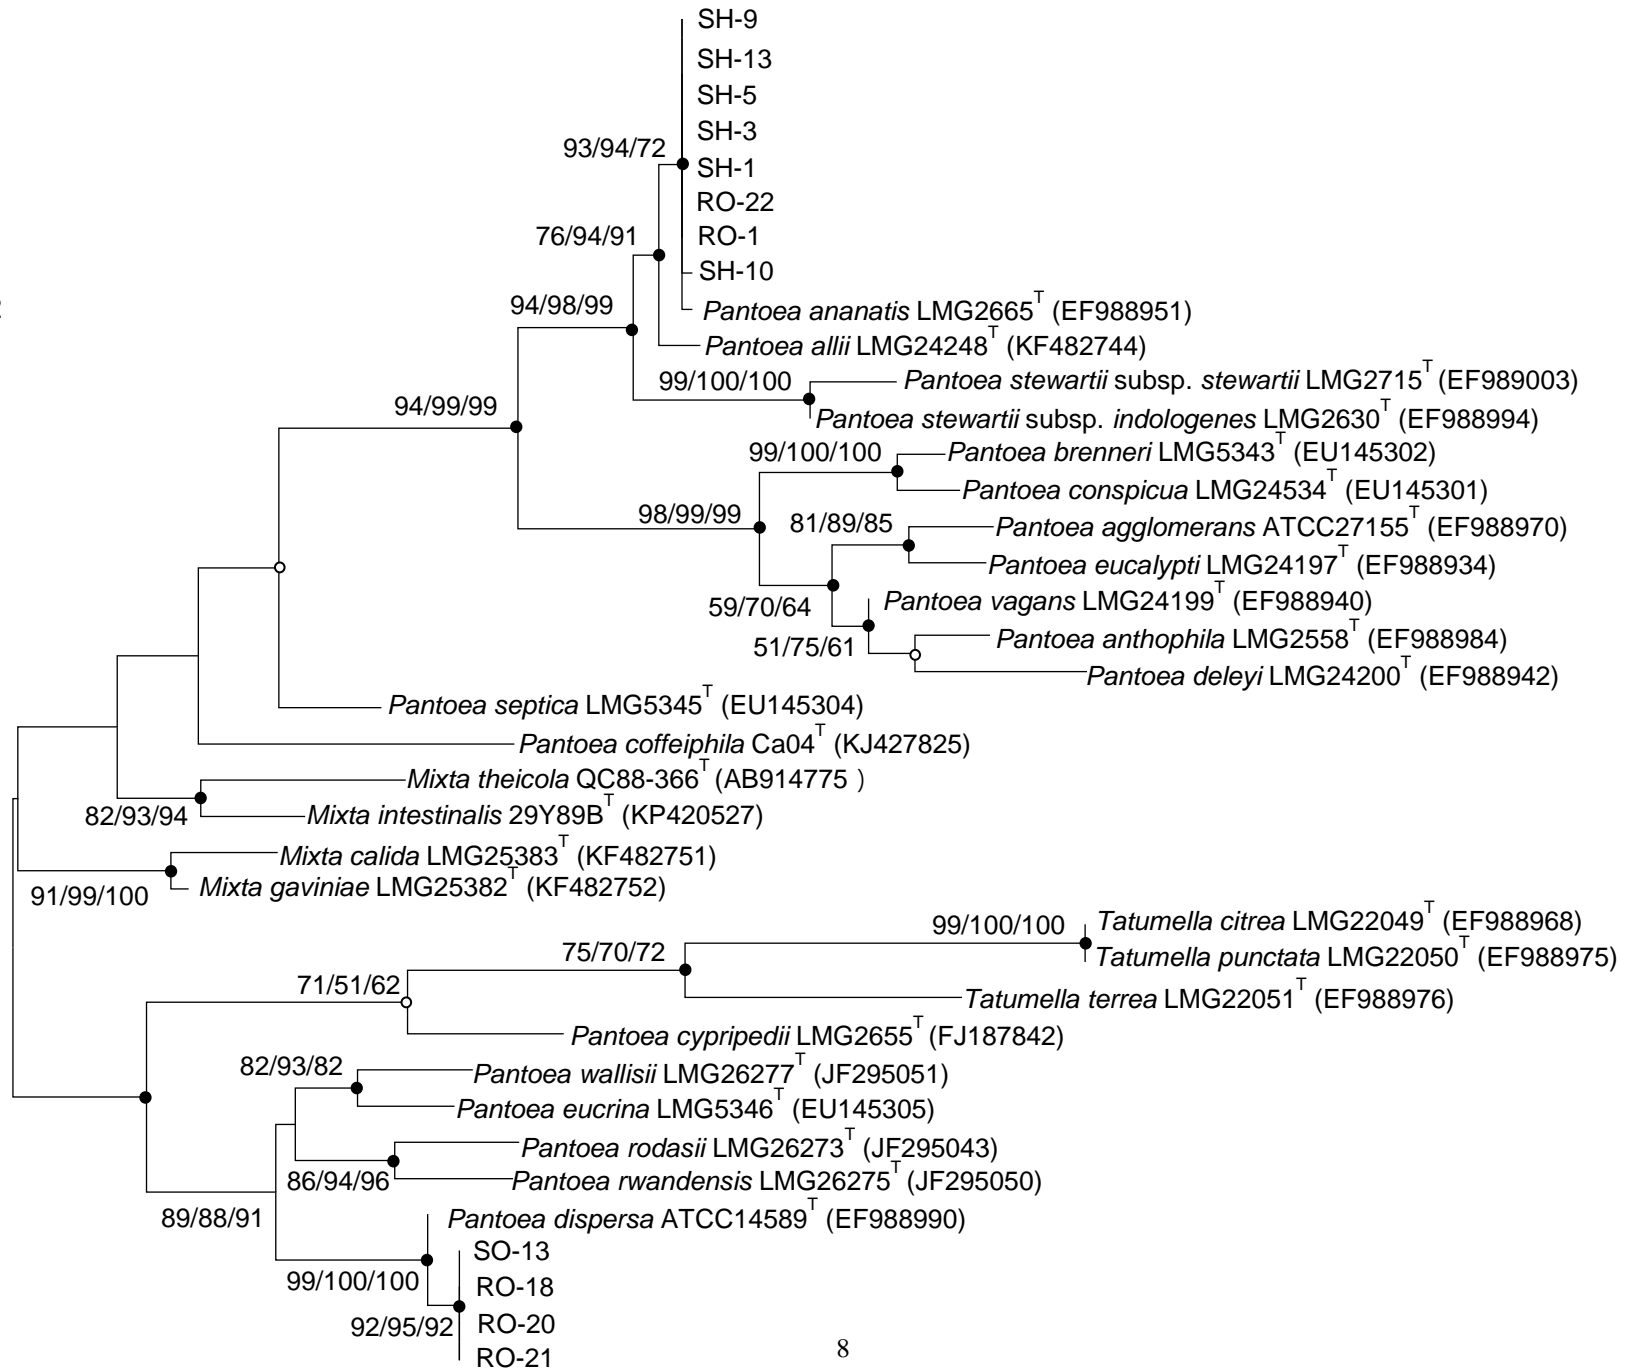

0.020



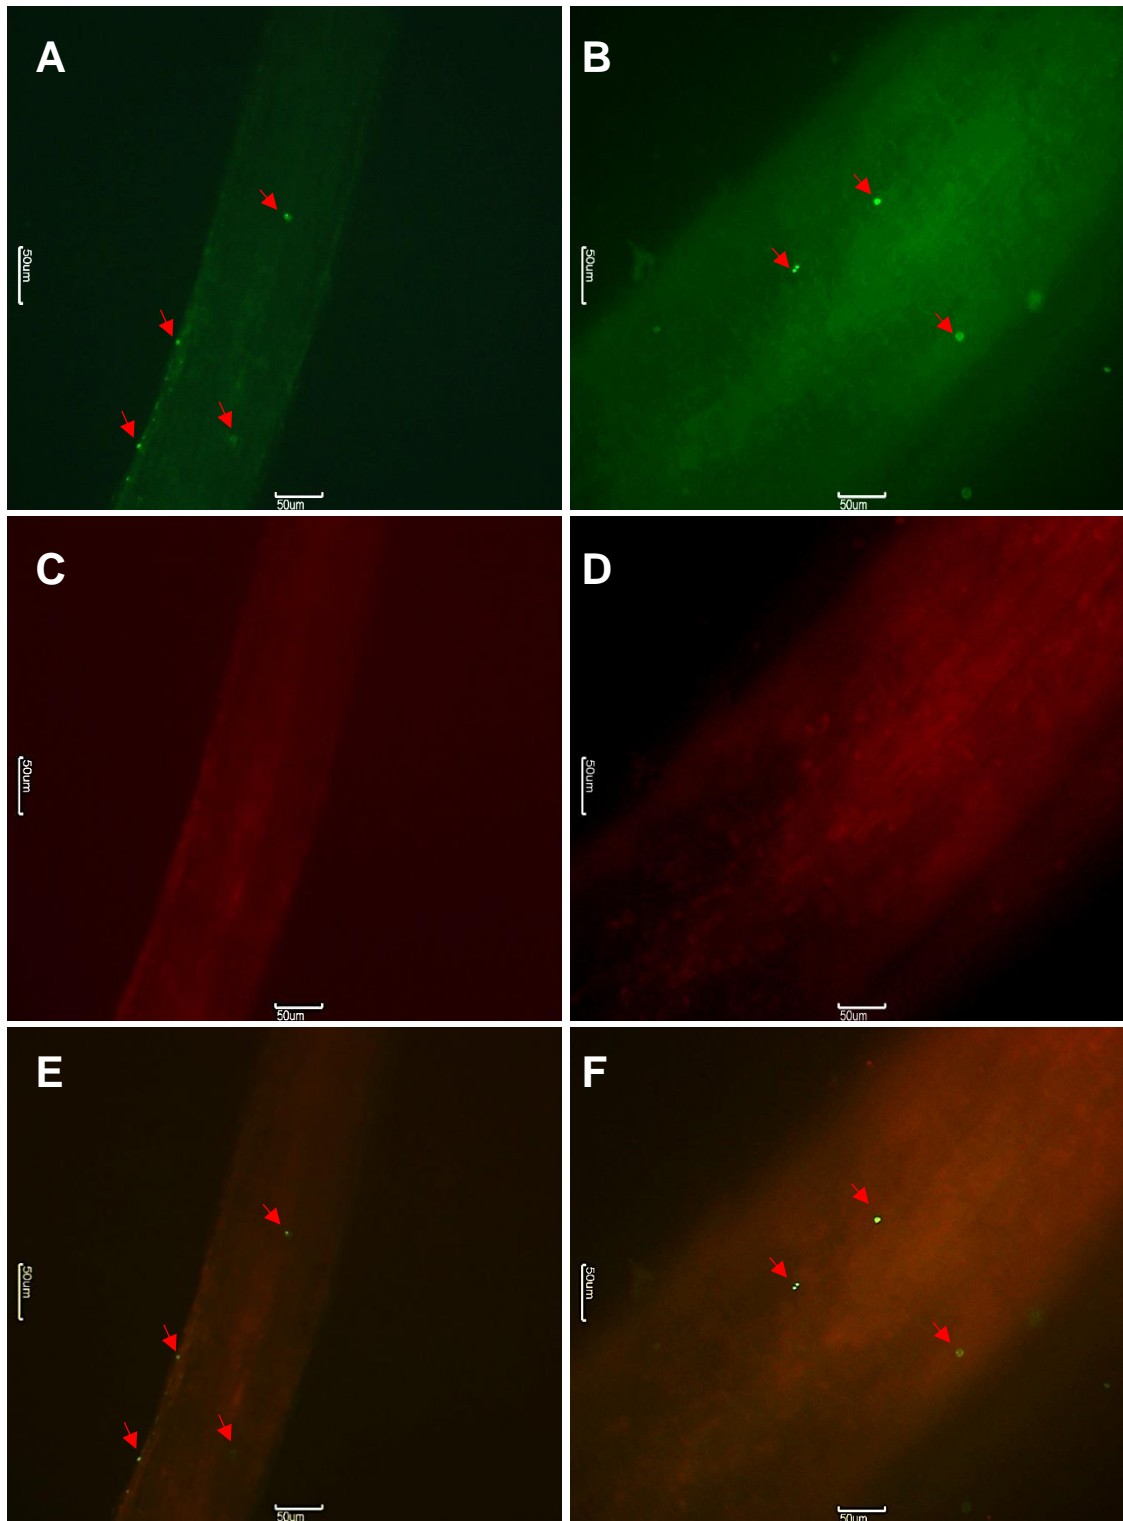

**Supplementary Fig. S3.** Bacterial cells of GFP-labeled RO-21 in the roots after inoculation for 18h. The images represent the micrographs of GFP filter (shown in green, **A** and **B**), autofluorescence of chlorophyll (shown in red, **C** and **D**) and the merged images from two micrographs (**E** and **F**). The red arrows point to the bacterial cells. Scale bars=50  $\mu$ M.

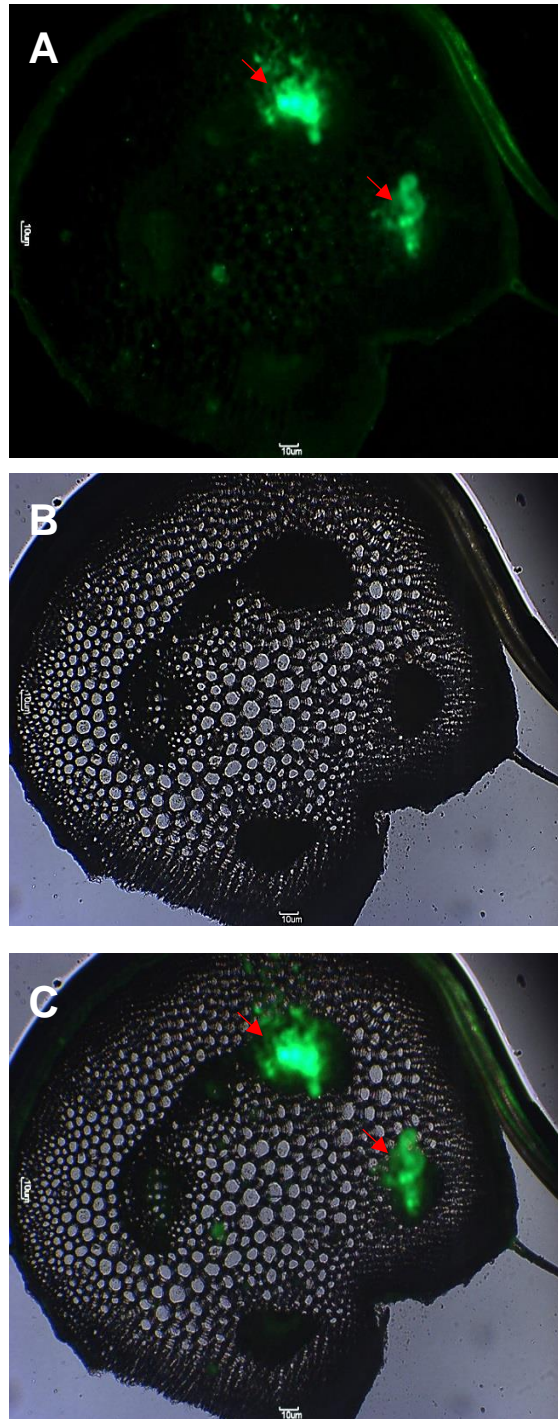

**Supplementary Fig. S4.** Colonization of GFP-labeled RO-21 in the sweet potato petiole tissue.

The colonization of GFP-labeled RO-21 was observed in the cross-section of petiole after inoculation with GFP-labeled RO-21 for 7 d. Images were taken with the GFP filter (A) and bright filter (B), and combined image from two micrographs (C). The red arrows point to the bacterial aggregates. Scale bars=10  $\mu$ M.

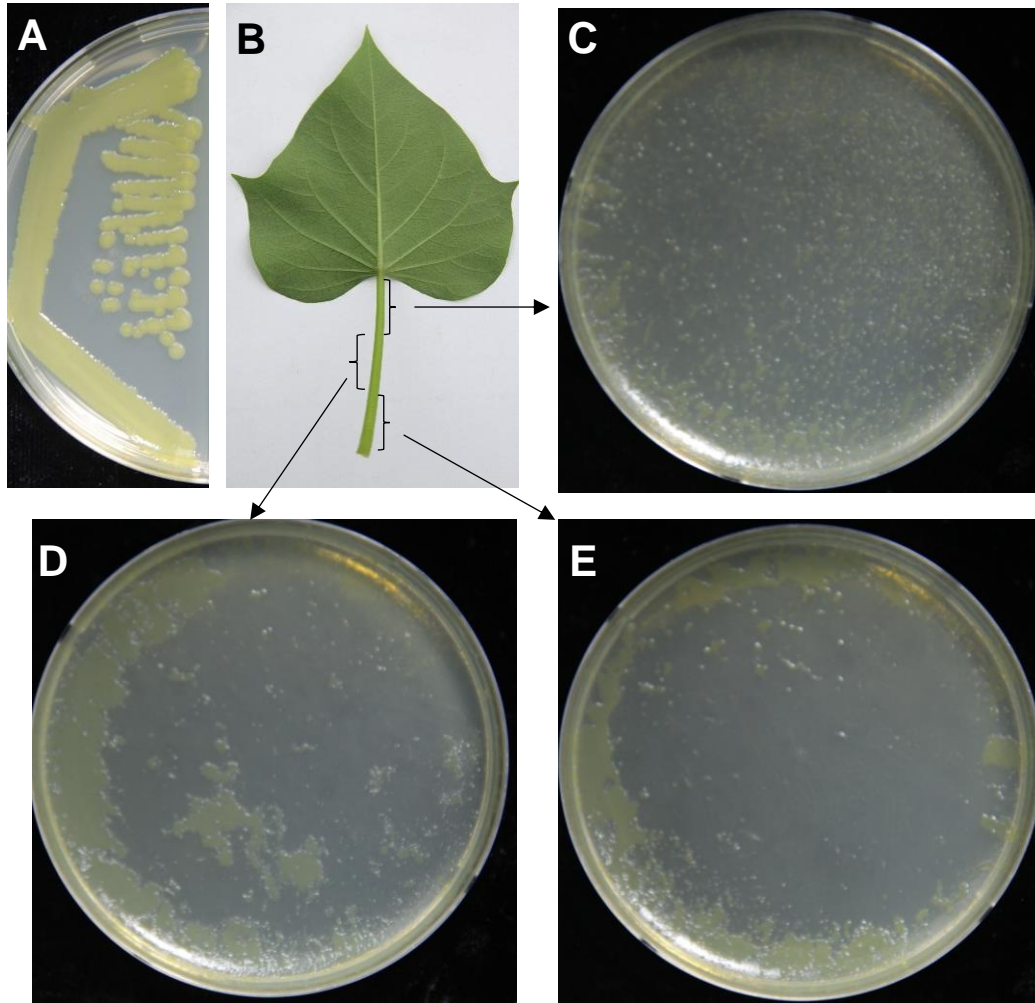

**Supplementary Fig. S5.** Re-isolation of GFP-labeled strain RO-21 from sweet potato plants. **(A)** The GFP-labeled strain RO-21 bacteria were streaked on selective medium. **(B)** Detached leaf petiole from sweet potato plants after inoculation with GFP-labeled RO-21 for 7 d. **(C-E)** Sweet potato leaf petioles were surface-sterilized and obtained bacterial colonies on selective medium after 3 d.

**A**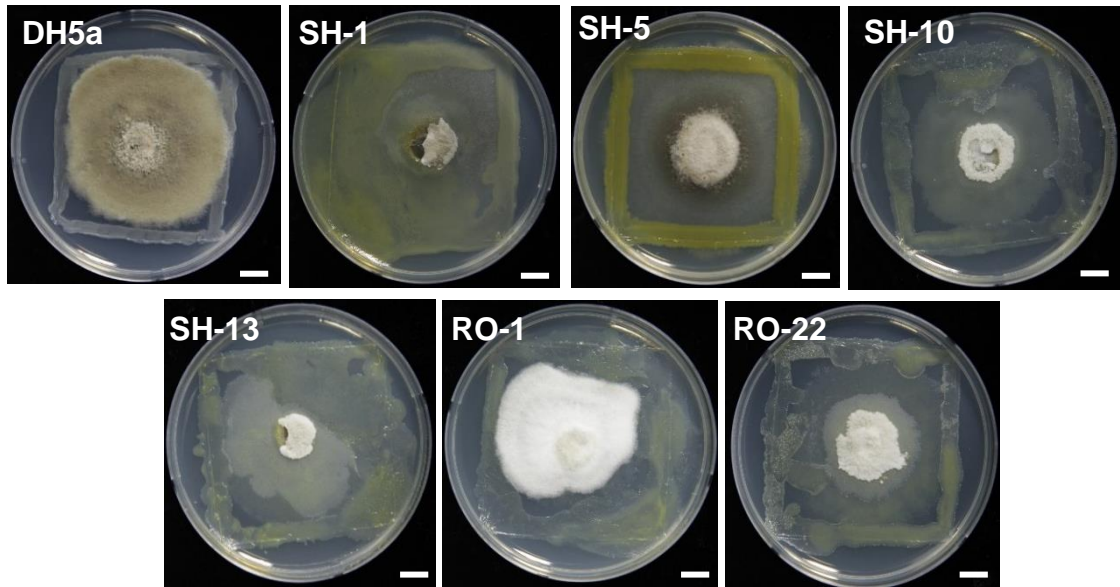**B**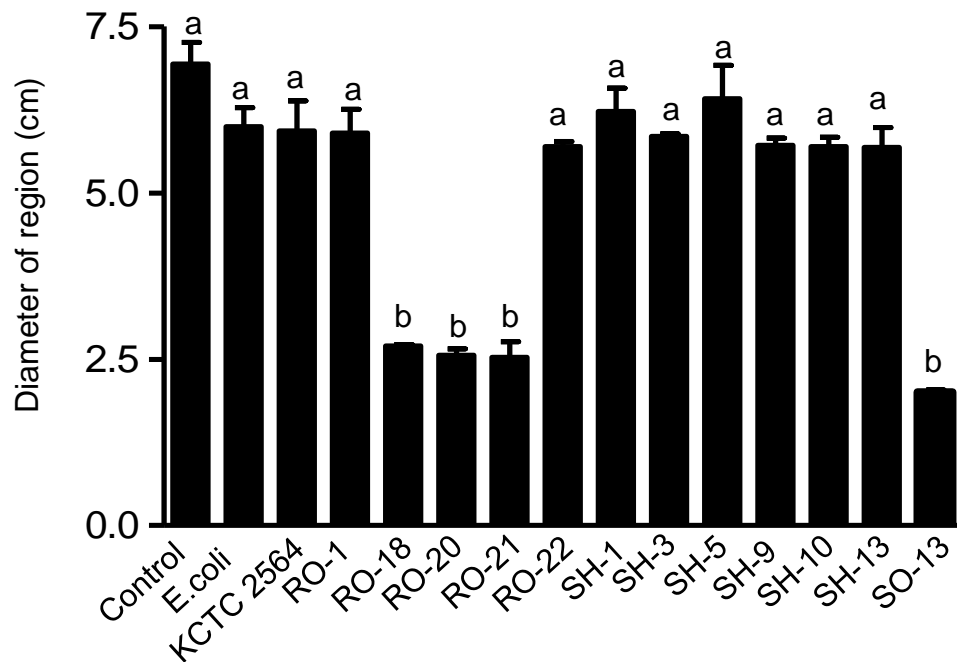

**Supplementary Fig. S6.** Inhibition effects of *Pantoea* isolates against the phytopathogenic fungus *C. fimbriata*. (A) Dual culture assay of *C. fimbriata* and *Pantoea* isolates (SH-1, SH-5, SH-10, SH-13, RO-1, and RO-22) at 16 d. *Escherichia coli* were used as controls (scale bar = 1 cm). (B) The diameter of *C. fimbriata* after co-incubation with *Pantoea* strains. The bars indicate the standard errors of triplicate samples. Values followed by a different letter are significantly different ( $P \leq 0.05$ ).

**A**

RO-18

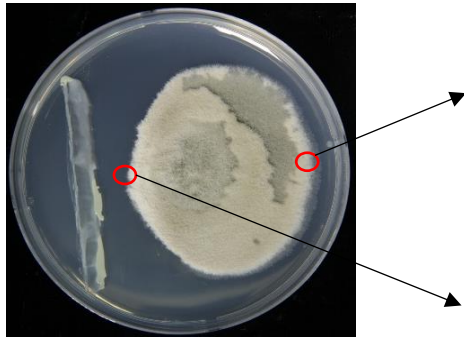

Evans blue

Neutral red

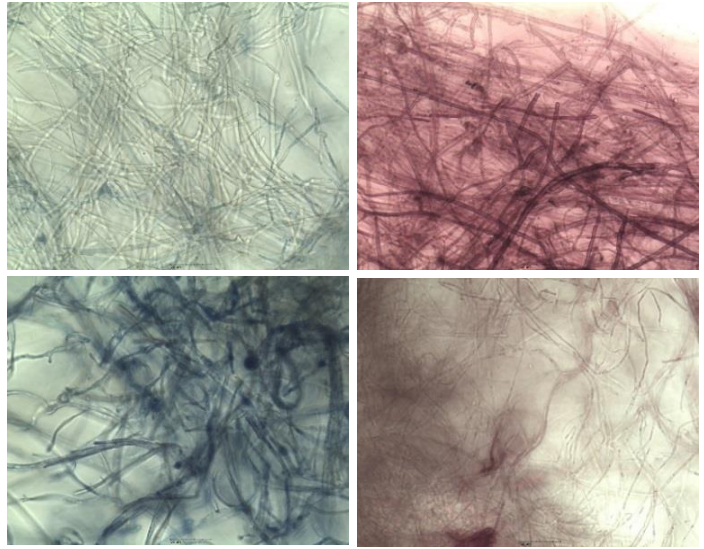

**B**

RO-20

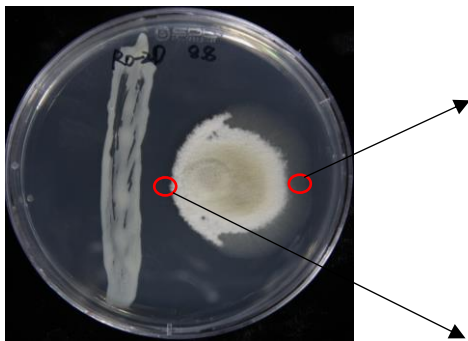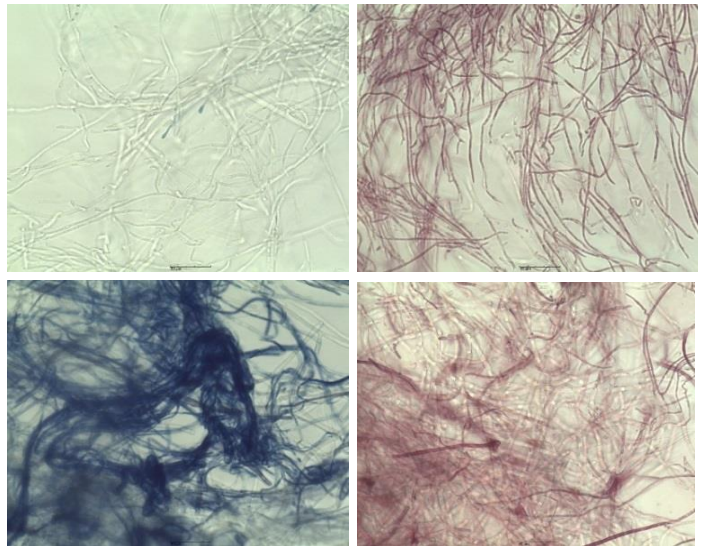

**C**

SH-3

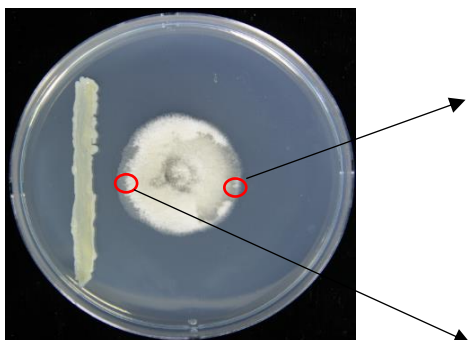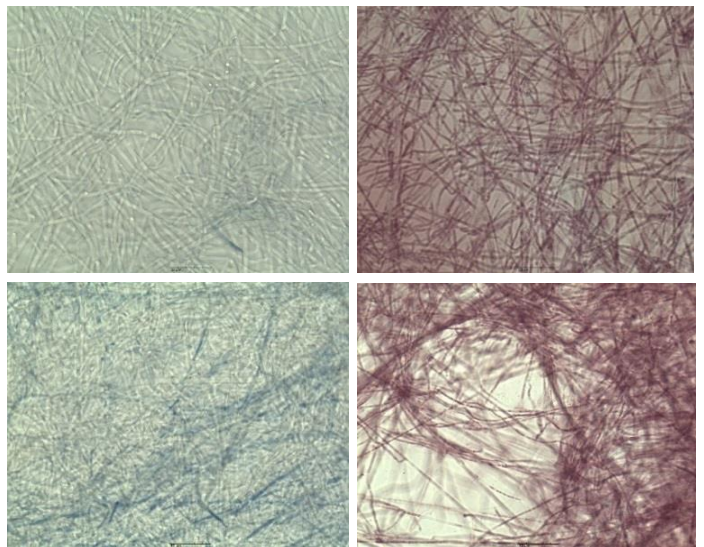

**Supplementary Fig. S7.** Interaction effect of *C. fimbriata* with *Pantoea* RO-18, RO-20, and SH-3. *C. fimbriata* cells were stained with Evans blue (dead cells stain blue) and Neutral red (viable cells stain red) after co-cultivation with strain RO-18, RO-20, and SH-3 for 10 d. Mycelia growing near to RO-18 and RO-20 stained blue (**A, B**), while those in the control zone on the other side only exhibited faint staining. By contrast, mycelia that were co-cultured with SH-3 did not stain blue in any region (**C**). Scale bars are 50  $\mu$ m.
